# Supplementary material for: Dynamic Risk Maps Predict Highly Pathogenic Avian Influenza Hotspots Across North America
Source: Research Square preprint supplement (doi:10.21203/rs.3.rs-8605487/v1), 2026-01-28
Supplement: Supplementary file 1 [file 2c2bc8a41379fb9da2119b85.docx]

| **Species 1** | **Species 2** | **Species 3** |
| --- | --- | --- |
| Accipiter cooperii | Aythya valisineria | Scolopax minor |
| Accipiter striatus | Botaurus lentiginosus | Charadrius semipalmatus |
| Actitis macularius | Branta bernicla | Charadrius vociferus |
| Aechmophorus occidentalis | Branta canadensis | Chlidonias niger |
| Aix sponsa | Branta hutchinsii | Clangula hyemalis |
| Anas acuta | Bubulcus ibis | Coragyps atratus |
| Anas crecca | Bucephala albeola | Cygnus buccinator |
| Anas fulvigula | Bucephala clangula | Cygnus columbianus |
| Anas platyrhynchos | Bucephala islandica | Cygnus olor |
| Anas rubripes | Buteo jamaicensis | Dendrocygna autumnalis |
| Anhinga anhinga | Buteo lagopus | Egretta caerulea |
| Anser albifrons | Buteo lineatus | Egretta thula |
| Anser caerulescens | Buteo platypterus | Egretta tricolor |
| Aquila chrysaetos | Buteo swainsoni | Elanus leucurus |
| Aramus guarauna | Cairina moschata | Eudocimus albus |
| Ardea alba | Calidris alba | Fregata magnificens |
| Ardea herodias | Calidris alpina | Fulica americana |
| Arenaria interpres | Calidris himantopus | Gallinago delicata |
| Aythya affinis | Calidris mauri | Gavia immer |
| Aythya americana | Calidris melanotos | Gavia stellata |
| Aythya collaris | Calidris minutilla | Grus canadensis |
| Aythya marila | Calidris pusilla | Haematopus palliatus |
| Ictinia mississippiensis | Cathartes aura | Haliaeetus leucocephalus |
| Larus californicus | Numenius americanus | Hydroprogne caspia |
| Larus delawarensis | Numenius phaeopus | Somateria mollissima |
| Larus fuscus | Nyctanassa violacea | Spatula clypeata |
| Larus glaucescens | Nycticorax nycticorax | Spatula cyanoptera |
| Larus glaucoides | Oxyura jamaicensis | Spatula discors |
| Larus heermanni | Pandion haliaetus | Sterna forsteri |
| Larus marinus | Pelecanus erythrorhynchos | Sterna hirundo |
| Larus occidentalis | Pelecanus occidentalis | Sternula antillarum |
| Limnodromus griseus | Phaethon aethereus | Sula dactylatra |
| Limnodromus scolopaceus | Platalea ajaja | Sula leucogaster |
| Limosa fedoa | Plegadis chihi | Thalasseus maximus |
| Lophodytes cucullatus | Plegadis falcinellus | Tringa flavipes |
| Mareca americana | Pluvialis squatarola | Tringa melanoleuca |
| Mareca strepera | Podiceps auritus | Tringa semipalmata |
| Megaceryle alcyon | Podiceps grisegena | Tringa solitaria |
| Melanitta americana | Podiceps nigricollis | Urile penicillatus |
| Melanitta deglandi | Podilymbus podiceps | - |
| Melanitta perspicillata | Porzana carolina | - |
| Mergus merganser | Rallus crepitans | - |
| Mergus serrator | Rallus limicola | - |
| Morus bassanus | Recurvirostra americana | - |
| Mycteria americana | Rynchops niger | - |
