# Supplementary material for: Dynamic Risk Maps Predict Highly Pathogenic Avian Influenza Hotspots Across North America
Source: Research Square preprint supplement (doi:10.21203/rs.3.rs-8605487/v1), 2026-01-28
Supplement: Supplementary file 2 [file c60e55ce07f033c6d508719c.docx]

| Category | Variable(s) | Resolution | Source(s) |
| --- | --- | --- | --- |
| Wild‐bird occurrence | Species observations (1990-2025) | Point | eBird, GBIF |
| Livestock density | Poultry, cattle (2018) | 1 km | FAO GLIMS |
| Human population | GPWv4 (2020) | 1 km | CIESIN |
| Climate | Temperature & precipitation normals | 1 km | WorldClim v2.1 |
| Outbreak locations | Confirmed HPAI events (2015-2025) | Point | FAO EMPRES‐i, WOAH WAHIS, CFIA NEOC GIS |
| Land cover | MODIS MCD12Q1 (2019) | 500 m (aggregated) | NASA LP‐DAAC |
| Vegetation dynamics | MODIS NDVI & EVI (2001–2024) | 500 m (aggregated) | NASA LP‐DAAC |
