# Supplementary material for: Dynamic Risk Maps Predict Highly Pathogenic Avian Influenza Hotspots Across North America
Source: Research Square preprint supplement (doi:10.21203/rs.3.rs-8605487/v1), 2026-01-28
Supplement: Supplementary file 3 [file c7766e8d0092c621d4665e86.docx]

| EPI_SET_260114dw | https://doi.org/10.55876/gis8.260114dw | 14,363 | 14,363 2021-12-16 to 2025-03-31 | 5 |
| --- | --- | --- | --- | --- |

**Extended Data Table 2.** GISAID Acknowledgment table.
